# Supplementary material
Source: PubMed Central journal article supplement (PMC7963734)
Supplement: 17-00355.pdf [file 17-00355.pdf]

**On-line Table: Demographic and clinical information of all patients with FD included in the retrospective analysis (retrospective FD group) and of the subgroup of patients with FD included in the qMRI analysis (qMRI FD subgroup)<sup>a</sup>**

|                              | Retrospective<br>FD Group<br>(n = 133) | qMRI FD<br>Subgroup<br>(n = 26) |
|------------------------------|----------------------------------------|---------------------------------|
| Age (mean) (yr)              | 41 ± 13.8                              | 43 ± 12                         |
| Sex (M/F)                    | 53:80                                  | 9:17                            |
| Hypertension                 | 30/133                                 | 6/26                            |
| Arrhythmia                   | 9/133                                  | 0/26                            |
| Left ventricular hypertrophy | 62/133                                 | 19/26                           |
| Renal failure                | 43/133                                 | 15/26                           |
| Proteinuria                  | 60/133                                 | 15/26                           |
| Neurologic symptoms          | 29/133                                 | 12/26                           |
| Diabetes mellitus            | 4/133                                  | 0/26                            |
| Gastrointestinal involvement | 43/133                                 | 8/26                            |
| Tobacco                      | 13/133                                 | 3/26                            |
| Alcohol                      | 25/133                                 | 11/26                           |
| ERT                          | 85/133                                 | 25/26                           |
| ERT duration (mean)          | 39.9 ± 61.6                            | 43.8 ± 51.2                     |

<sup>a</sup> ERT duration is expressed in months.
